# Supplementary material for: Computational insights in repurposing a cardiovascular drug for Alzheimer's disease: the role of aromatic amino acids in stabilizing the drug through π–π stacking interaction
Source: Royal Society of Chemistry journal article supplement (doi:10.1039/d4cp03291h), 2024-12-02
Supplement: d4cp03291h1.pdf [file d4cp03291h1.pdf]

-- Electronic Supplementary Information (ESI) --

**Computational Insights in Repurposing Cardiovascular Drug for  
Alzheimer's Disease: The Role of Aromatic Amino Acids in  
Stabilizing the Drug through  $\pi$ - $\pi$  Stacking Interaction**

**S. M. Esther Rubavathy,<sup>†</sup> and M. Prakash<sup>†,\*</sup>**

<sup>†</sup> *Computational Chemistry Research Laboratory (CCRL),*

*Department of Chemistry, SRM Institute of Science and Technology, Kattankulathur-603 203,  
Chengalpattu, Tamil Nadu, India.*

**List of Contents**

**List of Figures**

**Fig. S1** Modification in histone protein to enhance gene expression and gene repression.

**Fig. S2** Pie chart of time consumption for different entropy methods.

**Fig. S3** Selected ligands (Drug1-5) were bound with the zinc-binding active site of the HDAC2 protein.

**Fig. S4** Bond distance forcefield parameter.

**Fig. S5** 2D interactions of protein-ligand complexes after docking.

**Fig. S6** pi-pi stacking interactions of HDAC2 with the compounds after docking

**Fig. S7** RMSF plots for the apoprotein and complexes.

**Fig. S8** Rg plots for the protein-ligand complexes.

**Fig. S9** H-bonding plots for the complexes.

**Fig. S10.** Cluster analysis after MD simulations of HDAC2 with the compounds shows the H-bonding interaction

**Fig. S11** Cluster analysis after MD simulations of HDAC2 with the compounds shows the pi-pi stacking interactions.

**Fig. S12.** PCA plots for the complexes

**Fig. S13** DCCM plots for the complexes.

**Fig. S14** Contact map plots for the complexes.

**Fig. S15** Conformational analysis of the zinc with its active site.

**Fig. S16** Unbinding mechanism of the ligand from the zinc-binding site.

**Fig. S17** PMF energy profiles with the histogram configurations.

### **List of Tables**

**Table S1.** Bond distance forcefield parameter.

**Table S2.** Docking binding scores of 58 compounds against HDAC2.

**Table S3.** Bond and angle parameters of Drug 1 with the HDAC2 zinc-binding site.

**Table S4.** Bond and angle parameters of Drug 2 with the HDAC2 zinc-binding site.

**Table S5.** Bond and angle parameters of Drug 3 with the HDAC2 zinc-binding site.

**Table S6.** Bond and angle parameters of Drug 4 with the HDAC2 zinc-binding site.

**Table S7.** Bond and angle parameters of Drug 5 with the HDAC2 zinc-binding site.

**Table S8.** The average values of RMSD, RMSF, and Rg analysis of protein-ligand complexes.

**Table S9.** The average values of H-bond analysis of protein-ligand complexes.

**Table S10.** Binding energy values for protein-ligand complexes in Interaction Entropy (IE) method.

**Table S11.** Binding energy values for protein-ligand complexes in the C2 method.

**Table S12.** Binding energy values for protein-ligand complexes in the nmode method.

**Table S13.** Per-residue decomposition analysis for the complexes.

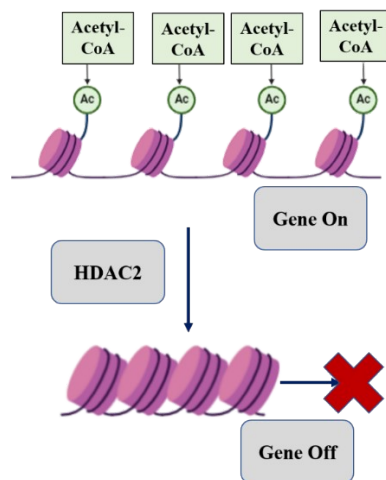

**Fig. S1** Modification in histone protein to enhance gene expression and gene repression

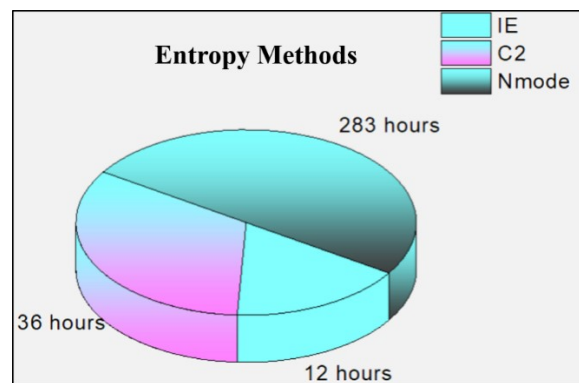

**Fig. S2** Pie chart of time consumption for different entropy methods

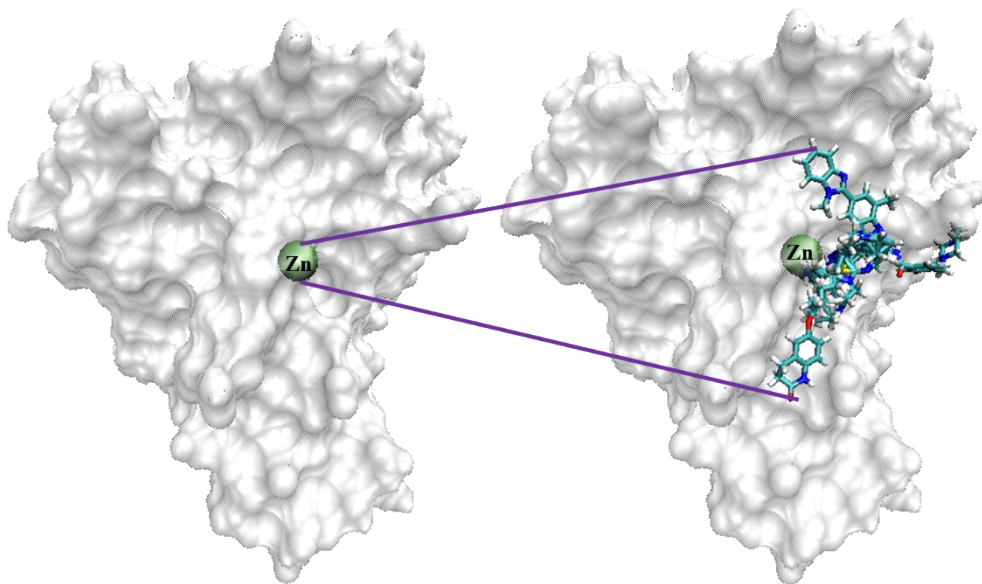

**Fig. S3** Selected ligands (Drug1-5) were bound with the zinc-binding active site of the HDAC2 protein.

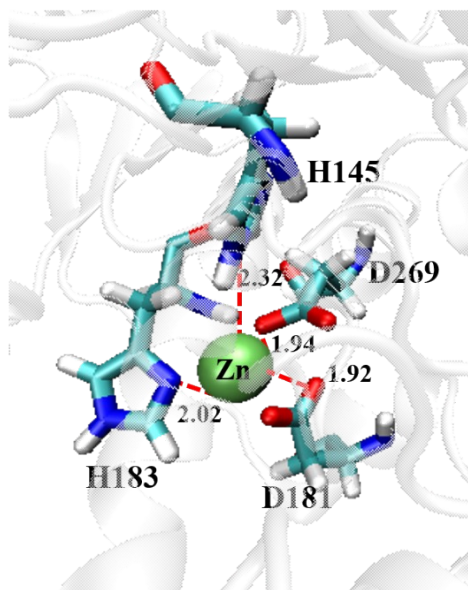

| Bond   | Bond Distance reported in ZAFF (Å) |                      | Bond Distance (Å) |
|--------|------------------------------------|----------------------|-------------------|
|        | Minimum distance (Å)               | Maximum distance (Å) |                   |
| ZN-NE1 | 1.60                               | 2.75                 | 2.02              |
| ZN-OD1 | 1.68                               | 2.98                 | 1.94              |
| ZN-OD2 | 1.35                               | 2.51                 | 1.92              |
| ZN-N1  | 1.82                               | 2.56                 | 2.32              |

**Fig. S4** and **Table S1** show the bond parameters of the zinc-binding active site of the HDAC2 protein. The bond distance forcefield parameter value which was derived by our method lies in between the minimum and maximum bond values which are reported in ZAFF

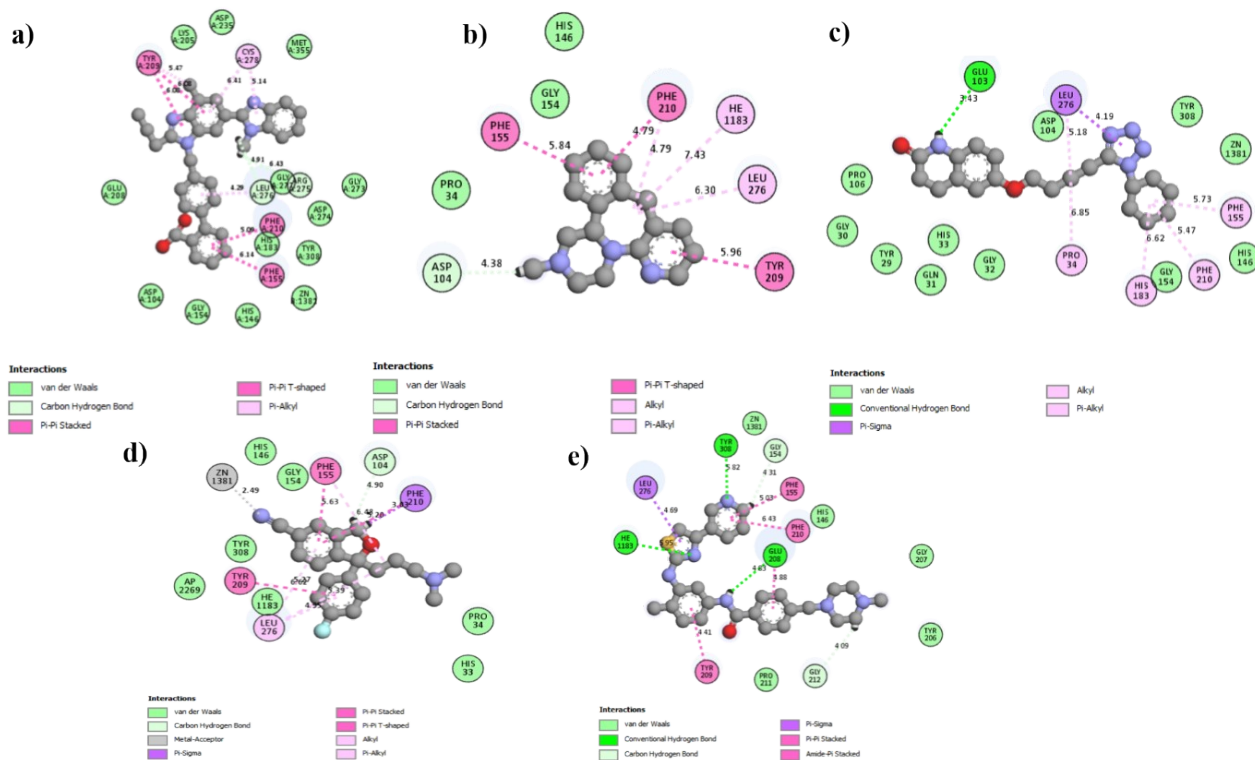

**Fig. S5** 2D interactions of protein-ligand complexes after docking.

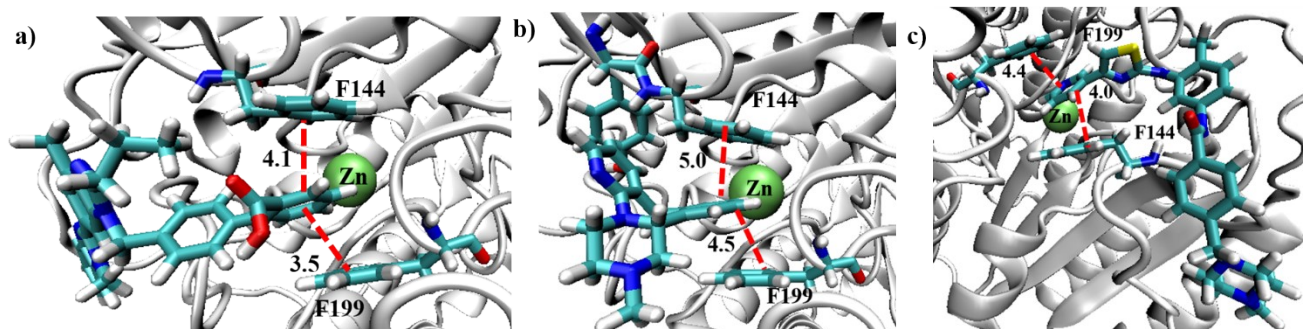

**Fig. S6** pi-pi stacking interactions of HDAC2 with the compounds after docking a) Drug1, b) Drug2, and c) Drug5.

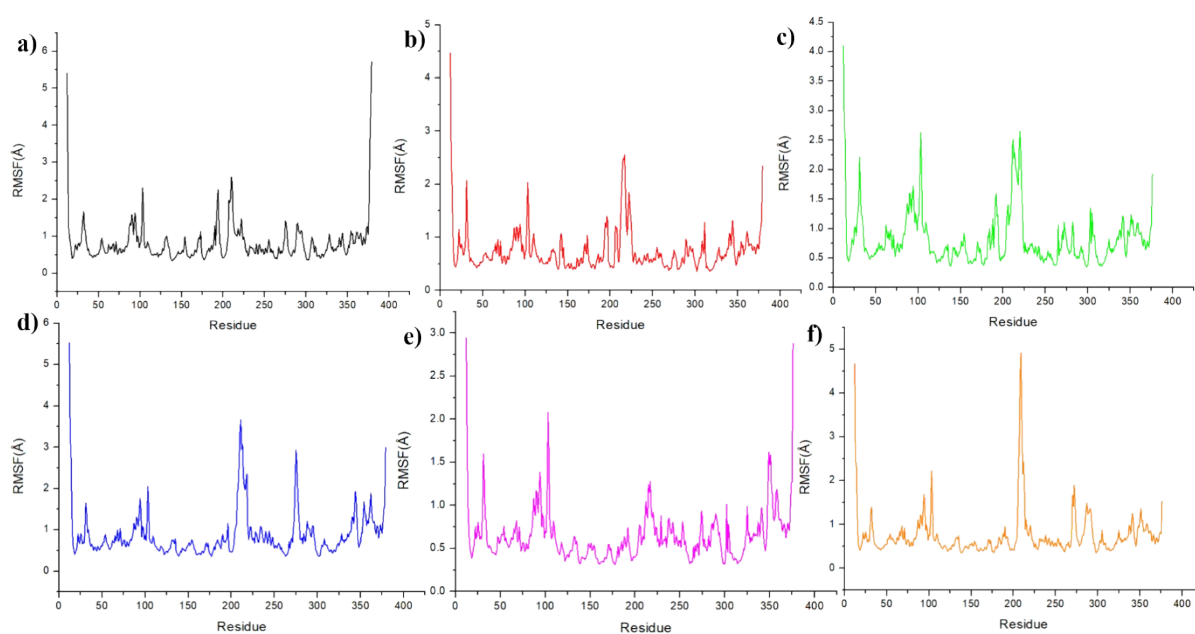

**Fig. S7** RMSF plots for the apoprotein and complexes a) HDAC2, b) HDAC2-Drug1, c) HDAC2-Drug2, d) HDAC2-Drug3, e) HDAC2-Drug4 and f) HDAC2-Drug5.

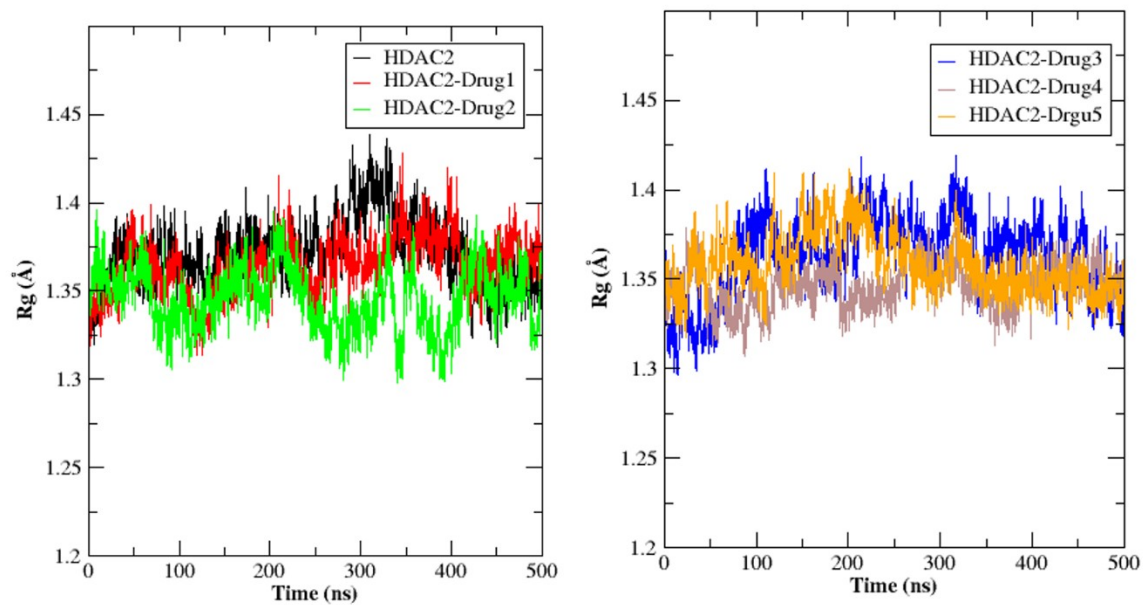

**Fig. S8** Rg plots for the protein-ligand complexes.

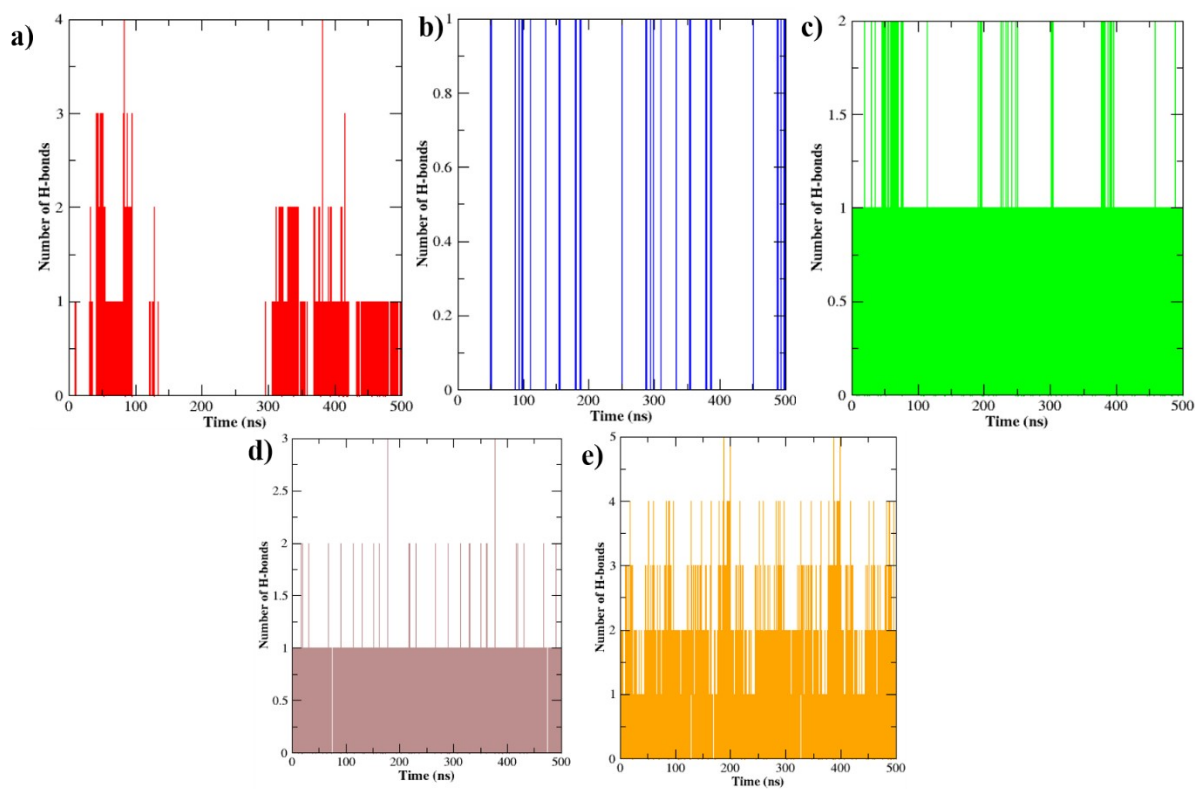

**Fig. S9** H-bonding plots for the complexes **a)** HDAC2-Drug1, **b)** HDAC2-Drug2, **c)** HDAC2-Drug3, **d)** HDAC2-Drug4, and **e)** HDAC2-Drug5.

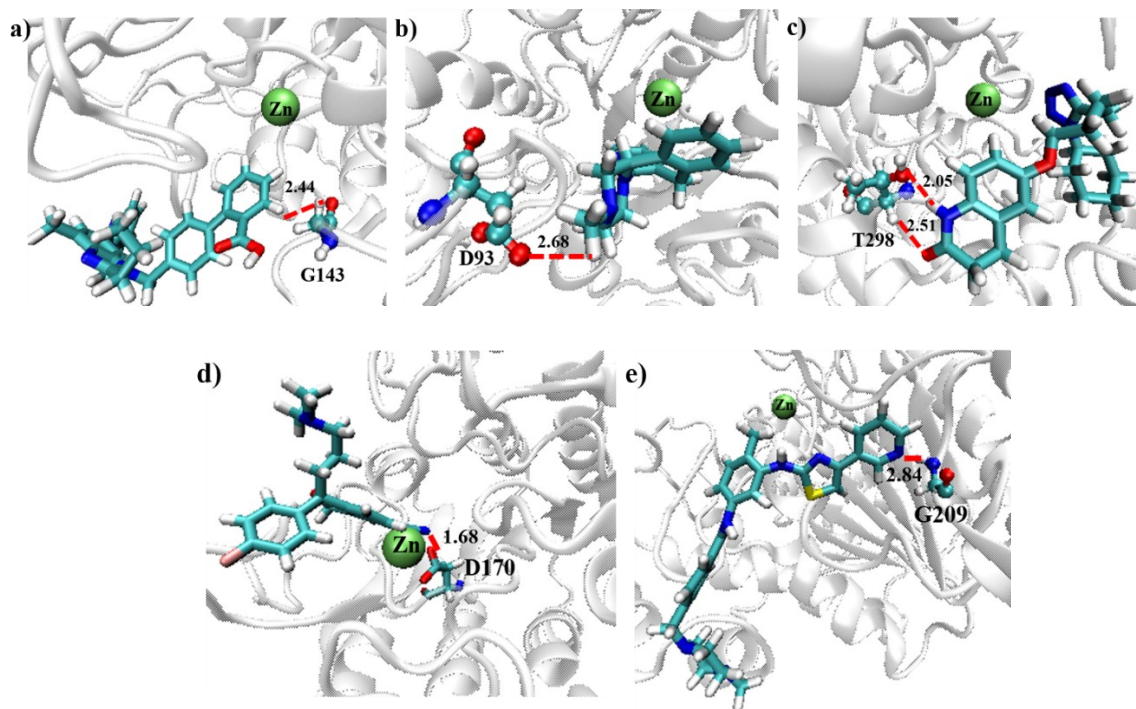

**Fig. S10** Cluster analysis after MD simulations of HDAC2 with the compounds shows the H-bonding interaction a) Drug1, b) Drug2, c) Drug3, d) Drug4, and e) Drug5.

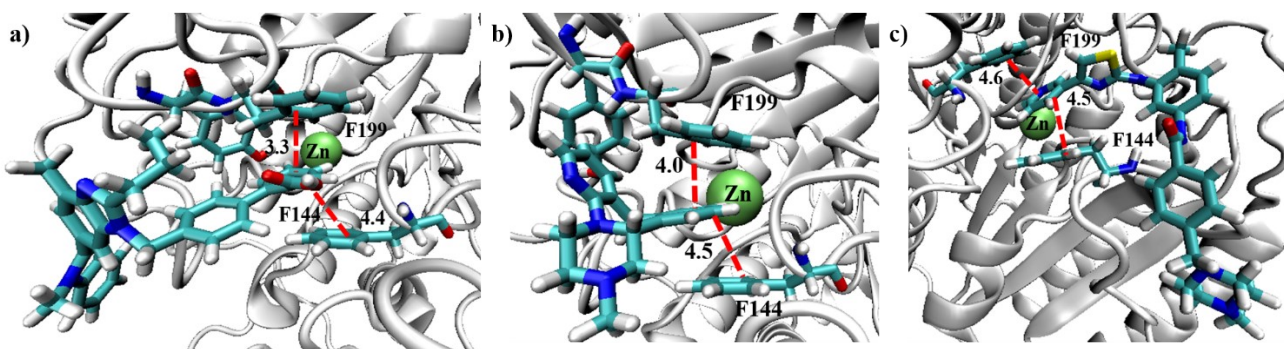

**Fig. S11** Cluster analysis after MD simulations of HDAC2 with the compounds shows the pi-pi stacking interactions a) Drug1, b) Drug2, and c) Drug5.

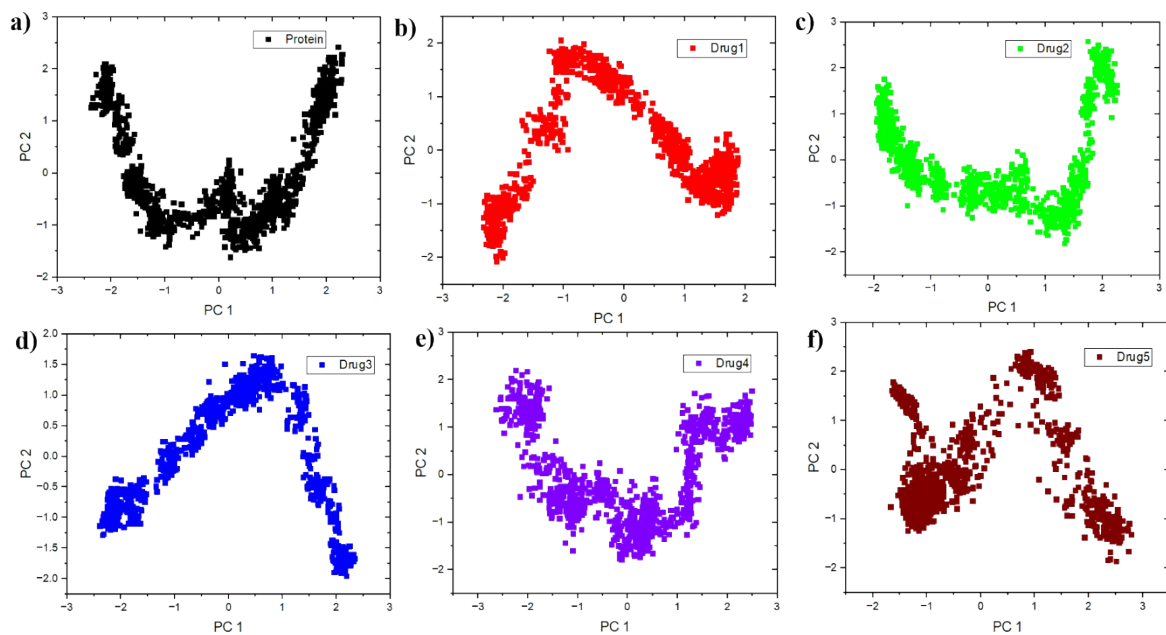

**Fig. S12** PCA plots for the apo-protein and complexes **a)** HDAC2, **b)** HDAC2-Drug1, **c)** HDAC2-Drug2, **d)** HDAC2-Drug3, **e)** HDAC2-Drug4, and **f)** HDAC2-Drug5.

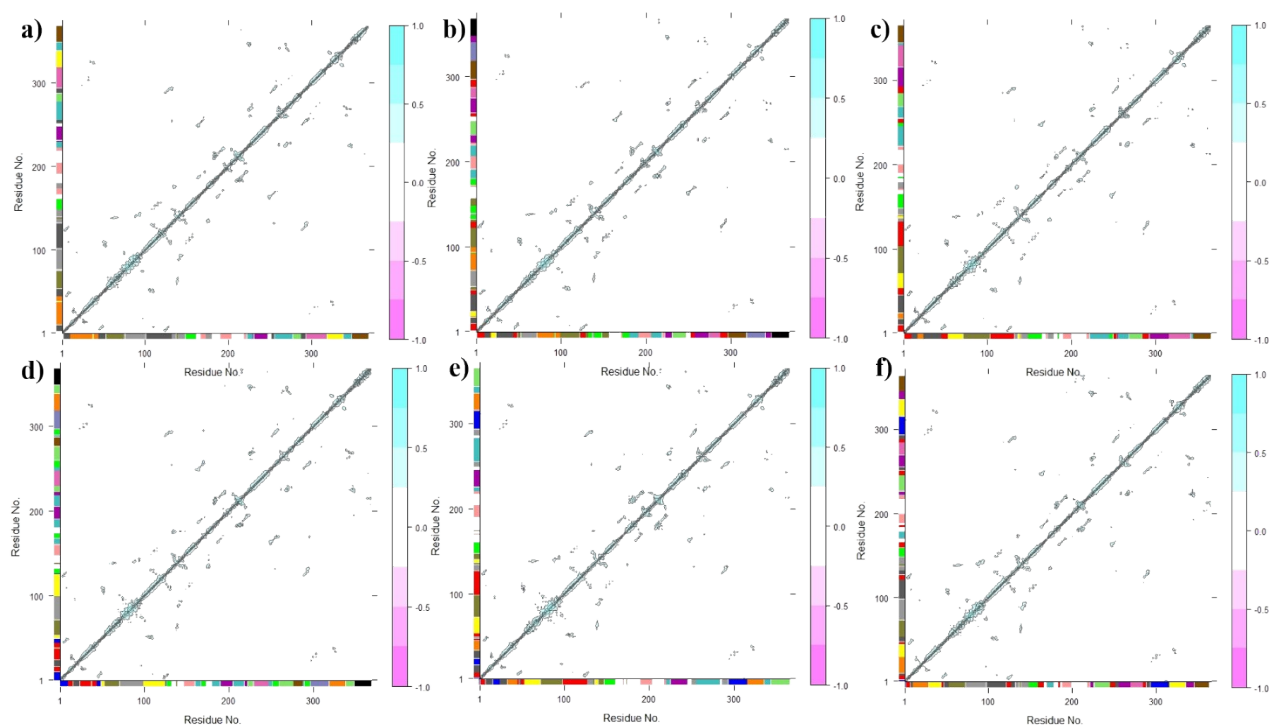

**Fig. S13** DCCM plots for the apo-protein and complexes **a)** HDAC2, **b)** HDAC2-Drug1, **c)** HDAC2-Drug2, **d)** HDAC2-Drug3, **e)** HDAC2-Drug4, and **f)** HDAC2-Drug5.



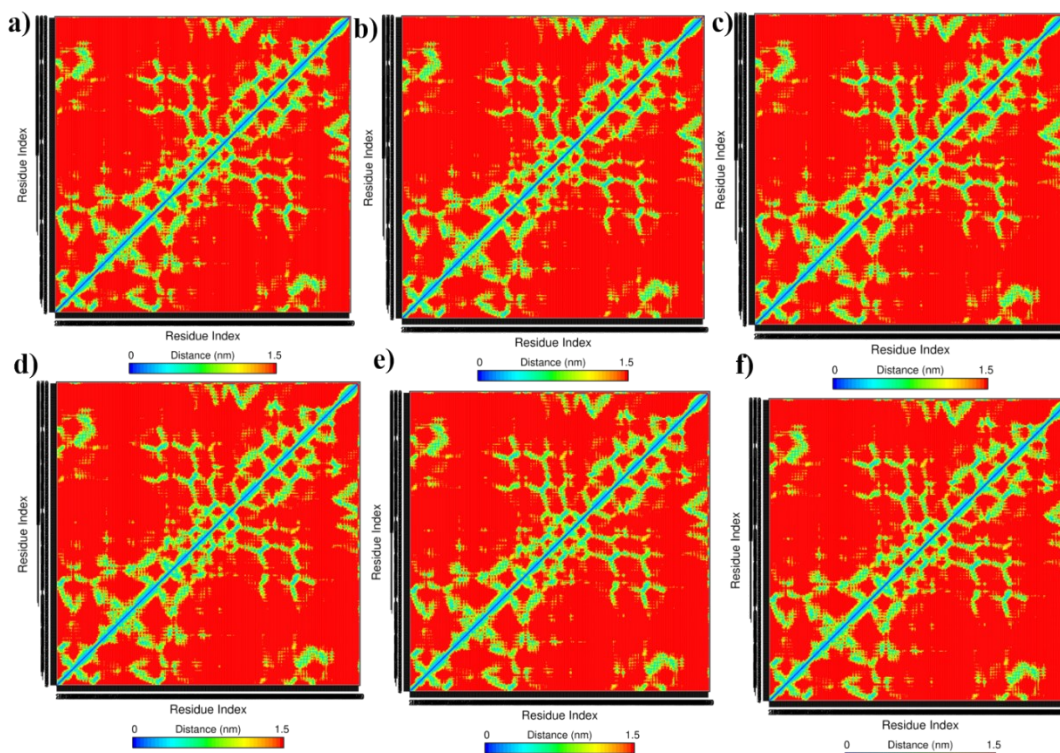

**Fig. S14** Contact map plots for the apoprotein and complexes a) HDAC2, b) HDAC2-Drug1, c) HDAC2-Drug2, d) HDAC2-Drug3, e) HDAC2-Drug4, and f) HDAC2-Drug5.

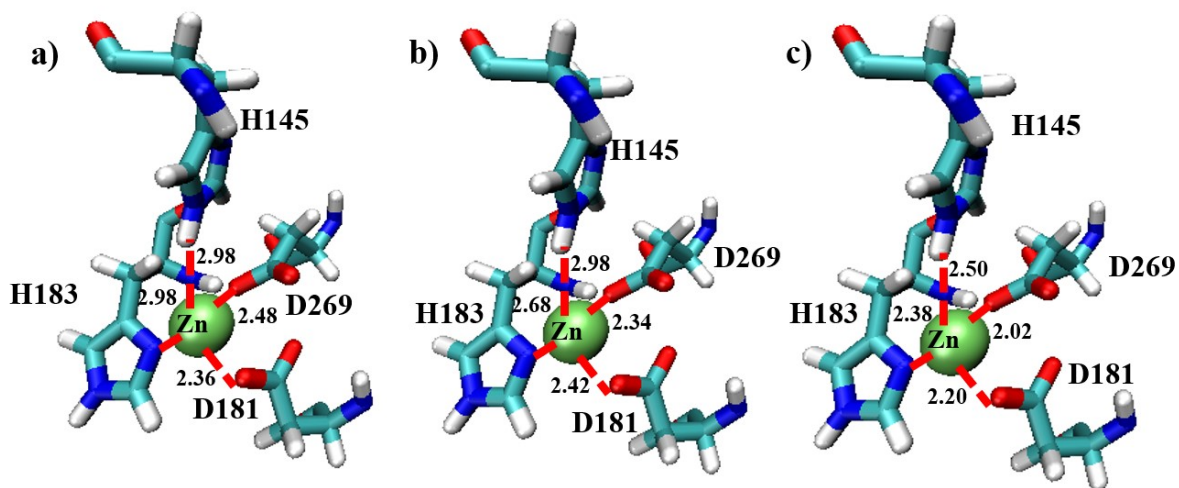

**Fig. S15** Conformational analysis of the zinc with its active site a) Apo-protein b) After docking and c) After cluster analysis.

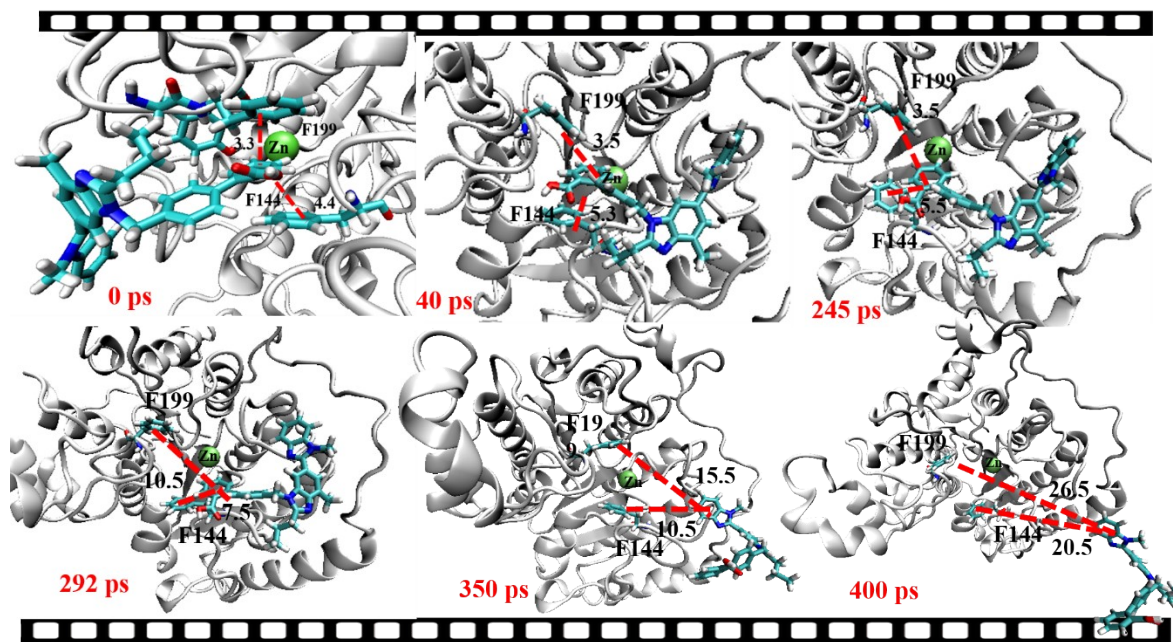

**Fig. S16** Unbinding mechanism of the ligand from the zinc-binding site with the time frame and distance.

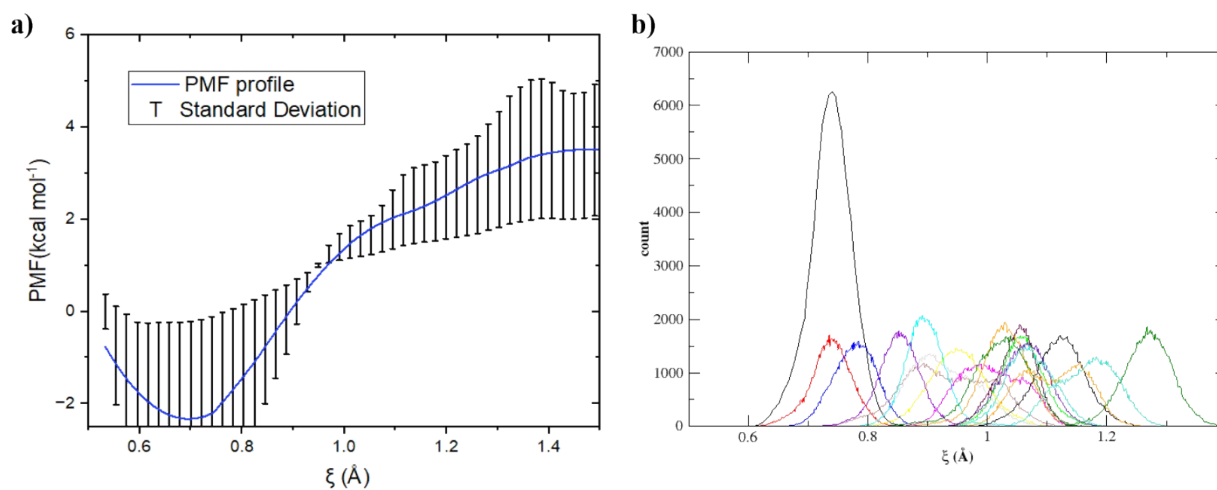

**Fig. S17** The energy profiles of HDAC2-Drug1 after SMD a) PMF energy profile of HDAC2-Drug1 b) Histograms of 50 best configurations.

**Table S2.** Docking binding scores of 58 compounds against HDAC2.

| S.No | Drugs               | Docking Scores |
|------|---------------------|----------------|
| 1    | Aciclovir           | -5.4           |
| 2    | Allopregnanolone    | -6.2           |
| 3    | Amlodipine          | -5.2           |
| 4    | Atorvastatin        | -7.2           |
| 5    | Allopurinol         | -5.2           |
| 6    | Bdpp                | -6.3           |
| 7    | Benfotiamine        | -6.2           |
| 8    | Bromocriptine       | -7.6           |
| 9    | Bupropion           | -5.9           |
| 10   | Candesartan         | -7.2           |
| 11   | Cannabidiol         | -5.9           |
| 12   | <b>Cilostazol</b>   | <b>-8.7</b>    |
| 13   | Cromolyn            | -7.1           |
| 14   | Dabigatran          | -7.0           |
| 15   | Dapagliflozin       | -7.6           |
| 16   | Deferiprone         | -4.8           |
| 17   | Donepezil           | -7.2           |
| 18   | Dronabinol          | -6.5           |
| 19   | Efavirenz           | -7.0           |
| 20   | Empagliflozin       | -7.3           |
| 21   | <b>Escitalopram</b> | <b>-8.7</b>    |
| 22   | Fasudil             | -6.3           |
| 23   | Foscarnet           | -4.5           |
| 24   | Galatamine          | -5.5           |
| 25   | Guanfacine          | -5.5           |
| 26   | Icosapent-Ethyl     | -4.9           |
| 27   | Levetiracetam       | -4.8           |
| 28   | Levodopa            | -5.9           |
| 29   | Losartan            | -6.3           |
| 30   | <b>Mastinib</b>     | <b>-8.6</b>    |
| 31   | Metformin           | -4.6           |
| 32   | Methylphenidate     | -6.1           |
| 33   | <b>Mirtazapine</b>  | <b>-8.8</b>    |
| 34   | Montelukast         | -8.0           |
| 35   | Nicotinamide        | -5.4           |
| 36   | Nicotine            | -5.3           |
| 37   | Nilotinib           | -7.4           |
| 38   | Penciclovir         | -5.6           |
| 39   | Perindopril         | -4.6           |
| 40   | Phenserine          | -7.2           |
| 41   | Prazosin            | -7.3           |
| 42   | Raloxifene          | -7.1           |
| 43   | Riluzole            | -6.4           |
| 44   | Rivastigmine        | -4.6           |
| 45   | Rosiglitazone       | -6.0           |
| 46   | Rotigotine          | -6.2           |

|    |                        |             |
|----|------------------------|-------------|
| 47 | Salsalte               | -6.7        |
| 48 | Sodium-Phenyl butyrate | -6.0        |
| 49 | <b>Telmisartan</b>     | <b>-9.4</b> |
| 50 | Thalidomide            | -7.4        |
| 51 | Thiethylperazine       | -6.3        |
| 52 | Valaciclovir           | -5.6        |
| 53 | Valacyclovir           | -5.7        |
| 54 | Venlafaxine            | -6.2        |
| 55 | Vorinostat             | -6.3        |
| 56 | Zidovudine             | -5.5        |
| 57 | Zolpidem               | -6.3        |
| 58 | Zopiclone              | -6.4        |

**Table S3.** Bond and angle parameters of Drug 1 with the HDAC2 zinc-binding site.

| <b>Bond Type</b>  | <b>Bond stretch force constant (Kcal/(mol*Å<sup>2</sup>))</b> | <b>Bond length (Å)</b> |
|-------------------|---------------------------------------------------------------|------------------------|
| ZN-E1             | 68.53                                                         | 2.028                  |
| ZN-D1             | 73.98                                                         | 1.945                  |
| ZN-D2             | 93.42                                                         | 1.929                  |
| ZN-O              | 42.69                                                         | 2.018                  |
| C -O2             | 656.00                                                        | 1.250                  |
| C -D1             | 656.00                                                        | 1.250                  |
| C -D2             | 656.00                                                        | 1.250                  |
| CR-E1             | 488.00                                                        | 1.335                  |
| CC-E1             | 410.00                                                        | 1.394                  |
| OH-ZN             | 78.64                                                         | 1.951                  |
| N1-ZN             | 60.82                                                         | 1.993                  |
| O2-ZN             | 37.89                                                         | 2.093                  |
| NB-ZN             | 84.50                                                         | 1.992                  |
| O2-ZN             | 52.32                                                         | 2.051                  |
| <b>Angle Type</b> | <b>Angle bend force constant [Kcal/(mol*rad<sup>2</sup>)]</b> | <b>Angle [degree]</b>  |
| O -ZN-E1          | 23.313                                                        | 117.307                |
| O -ZN-D1          | 35.887                                                        | 110.838                |
| O -ZN-D2          | 44.443                                                        | 100.046                |
| E1-ZN-D1          | 29.398                                                        | 109.410                |
| E1-ZN-D2          | 34.849                                                        | 115.434                |
| D1-ZN-D2          | 42.090                                                        | 102.624                |
| C -O -ZN          | 27.898                                                        | 138.471                |
| C -D1-ZN          | 39.878                                                        | 134.618                |
| C -D2-ZN          | 54.049                                                        | 114.941                |
| CR-E1-ZN          | 63.840                                                        | 118.961                |
| CC-E1-ZN          | 68.556                                                        | 133.570                |
| CW-CC-E1          | 70.000                                                        | 120.000                |
| H5-CR-E1          | 35.000                                                        | 120.000                |

|          |         |         |
|----------|---------|---------|
| NA-CR-E1 | 70.000  | 120.000 |
| CC-E1-CR | 70.000  | 117.000 |
| CT-CC-E1 | 70.000  | 120.000 |
| CT-C -D1 | 70.000  | 117.000 |
| CT-C -D2 | 70.000  | 117.000 |
| CT-C -O2 | 70.000  | 117.000 |
| O2-C -D1 | 126.557 | 121.174 |
| O2-C -D2 | 126.557 | 121.174 |
| D1-ZN-OH | 28.321  | 81.560  |
| E1-ZN-OH | 231.671 | 98.119  |
| D2-ZN-OH | 27.440  | 98.008  |
| HO-OH-ZN | 52.287  | 78.808  |
| N -OH-ZN | 71.024  | 108.152 |
| D1-ZN-N1 | 126.122 | 28.798  |
| E1-ZN-N1 | 109.70  | 39.800  |
| D2-ZN-N1 | 114.003 | 41.808  |
| CZ-N1-ZN | 147.253 | 22.662  |
| O2-ZN-NB | 125.352 | 42.029  |
| O2-ZN-O2 | 110.640 | 39.595  |
| CO-O2-ZN | 88.343  | 91.355  |
| CR-NB-ZN | 133.855 | 61.171  |
| NB-ZN-O2 | 125.685 | 32.215  |
| CC-NB-ZN | 118.776 | 58.056  |
| CO-O2-ZN | 92.675  | 96.664  |

**Table S4.** Bond and angle parameters of Drug 2 with the HDAC2 zinc-binding site.

| <b>Bond Type</b>  | <b>Bond stretch force constant (Kcal/(mol*Å<sup>2</sup>))</b> | <b>Bond length (Å)</b> |
|-------------------|---------------------------------------------------------------|------------------------|
| ZN-E1             | 68.53                                                         | 2.028                  |
| ZN-D1             | 73.98                                                         | 1.945                  |
| ZN-D2             | 93.42                                                         | 1.929                  |
| ZN-O              | 42.69                                                         | 2.018                  |
| C -O2             | 656.00                                                        | 1.250                  |
| C -D1             | 656.00                                                        | 1.250                  |
| C -D2             | 656.00                                                        | 1.250                  |
| CR-E1             | 488.00                                                        | 1.335                  |
| CC-E1             | 410.00                                                        | 1.394                  |
| OH-ZN             | 78.64                                                         | 1.951                  |
| N1-ZN             | 60.82                                                         | 1.993                  |
| <b>Angle Type</b> | <b>Angle bend force constant [Kcal/(mol*rad<sup>2</sup>)]</b> | <b>Angle [degree]</b>  |
| O -ZN-E1          | 23.313                                                        | 117.307                |
| O -ZN-D1          | 35.887                                                        | 110.838                |
| O -ZN-D2          | 44.443                                                        | 100.046                |
| E1-ZN-D1          | 29.398                                                        | 109.410                |
| E1-ZN-D2          | 34.849                                                        | 115.434                |
| D1-ZN-D2          | 42.090                                                        | 102.624                |

|          |         |         |
|----------|---------|---------|
| C -O -ZN | 27.898  | 138.471 |
| C -D1-ZN | 39.878  | 134.618 |
| C -D2-ZN | 54.049  | 114.941 |
| CR-E1-ZN | 63.840  | 118.961 |
| CC-E1-ZN | 68.556  | 133.570 |
| CW-CC-E1 | 70.000  | 120.000 |
| H5-CR-E1 | 35.000  | 120.000 |
| NA-CR-E1 | 70.000  | 120.000 |
| CC-E1-CR | 70.000  | 117.000 |
| CT-CC-E1 | 70.000  | 120.000 |
| CT-C -D1 | 70.000  | 117.000 |
| CT-C -D2 | 70.000  | 117.000 |
| CT-C -O2 | 70.000  | 117.000 |
| O2-C -D1 | 126.557 | 121.174 |
| O2-C -D2 | 126.557 | 121.174 |
| D1-ZN-OH | 28.321  | 81.560  |
| E1-ZN-OH | 231.671 | 98.119  |
| D2-ZN-OH | 27.440  | 98.008  |
| HO-OH-ZN | 52.287  | 78.808  |
| N -OH-ZN | 71.024  | 108.152 |
| D1-ZN-N1 | 126.122 | 28.798  |
| E1-ZN-N1 | 109.70  | 39.800  |
| D2-ZN-N1 | 114.003 | 41.808  |
| CZ-N1-ZN | 147.253 | 22.662  |

**Table S5.** Bond and angle parameters of Drug 3 with the HDAC2 zinc-binding site.

| <b>Bond Type</b>  | <b>Bond stretch force constant (Kcal/(mol*Å<sup>2</sup>))</b> | <b>Bond length (Å)</b> |
|-------------------|---------------------------------------------------------------|------------------------|
| ZN-E1             | 68.53                                                         | 2.028                  |
| ZN-D1             | 73.98                                                         | 1.945                  |
| ZN-D2             | 93.42                                                         | 1.929                  |
| ZN-O              | 42.69                                                         | 2.018                  |
| C -O2             | 656.00                                                        | 1.250                  |
| C -D1             | 656.00                                                        | 1.250                  |
| C -D2             | 656.00                                                        | 1.250                  |
| CR-E1             | 488.00                                                        | 1.335                  |
| CC-E1             | 410.00                                                        | 1.394                  |
| OH-ZN             | 78.64                                                         | 1.951                  |
| N1-ZN             | 60.82                                                         | 1.993                  |
| O2-ZN             | 37.89                                                         | 2.093                  |
| NB-ZN             | 84.50                                                         | 1.992                  |
| O2-ZN             | 52.32                                                         | 2.051                  |
| <b>Angle Type</b> | <b>Angle bend force constant [Kcal/(mol*rad<sup>2</sup>)]</b> | <b>Angle [degree]</b>  |
| O -ZN-E1          | 23.313                                                        | 117.307                |
| O -ZN-D1          | 35.887                                                        | 110.838                |
| O -ZN-D2          | 44.443                                                        | 100.046                |

|          |         |         |
|----------|---------|---------|
| E1-ZN-D1 | 29.398  | 109.410 |
| E1-ZN-D2 | 34.849  | 115.434 |
| D1-ZN-D2 | 42.090  | 102.624 |
| C -O -ZN | 27.898  | 138.471 |
| C -D1-ZN | 39.878  | 134.618 |
| C -D2-ZN | 54.049  | 114.941 |
| CR-E1-ZN | 63.840  | 118.961 |
| CC-E1-ZN | 68.556  | 133.570 |
| CW-CC-E1 | 70.000  | 120.000 |
| H5-CR-E1 | 35.000  | 120.000 |
| NA-CR-E1 | 70.000  | 120.000 |
| CC-E1-CR | 70.000  | 117.000 |
| CT-CC-E1 | 70.000  | 120.000 |
| CT-C -D1 | 70.000  | 117.000 |
| CT-C -D2 | 70.000  | 117.000 |
| CT-C -O2 | 70.000  | 117.000 |
| O2-C -D1 | 126.557 | 121.174 |
| O2-C -D2 | 126.557 | 121.174 |
| D1-ZN-OH | 28.321  | 81.560  |
| E1-ZN-OH | 231.671 | 98.119  |
| D2-ZN-OH | 27.440  | 98.008  |
| HO-OH-ZN | 52.287  | 78.808  |
| N -OH-ZN | 71.024  | 108.152 |
| D1-ZN-N1 | 126.122 | 28.798  |
| E1-ZN-N1 | 109.70  | 39.800  |
| D2-ZN-N1 | 114.003 | 41.808  |
| CZ-N1-ZN | 147.253 | 22.662  |
| O2-ZN-NB | 125.352 | 42.029  |
| O2-ZN-O2 | 110.640 | 39.595  |
| CO-O2-ZN | 88.343  | 91.355  |
| CR-NB-ZN | 133.855 | 61.171  |
| NB-ZN-O2 | 125.685 | 32.215  |
| CC-NB-ZN | 118.776 | 58.056  |
| CO-O2-ZN | 92.675  | 96.664  |

**Table S6.** Bond and angle parameters of Drug 4 with the HDAC2 zinc-binding site.

| <b>Bond Type</b>  | <b>Bond stretch force constant (Kcal/(mol*Å<sup>2</sup>))</b> | <b>Bond length (Å)</b> |
|-------------------|---------------------------------------------------------------|------------------------|
| ZN-E1             | 68.53                                                         | 2.028                  |
| ZN-D1             | 73.98                                                         | 1.945                  |
| ZN-D2             | 93.42                                                         | 1.929                  |
| ZN-O              | 42.69                                                         | 2.018                  |
| C -O2             | 656.00                                                        | 1.250                  |
| C -D1             | 656.00                                                        | 1.250                  |
| C -D2             | 656.00                                                        | 1.250                  |
| CR-E1             | 488.00                                                        | 1.335                  |
| CC-E1             | 410.00                                                        | 1.394                  |
| OH-ZN             | 78.64                                                         | 1.951                  |
| <b>Angle Type</b> | <b>Angle bend force constant [Kcal/(mol*rad<sup>2</sup>)]</b> | <b>Angle [degree]</b>  |
| O -ZN-E1          | 23.313                                                        | 117.307                |
| O -ZN-D1          | 35.887                                                        | 110.838                |
| O -ZN-D2          | 44.443                                                        | 100.046                |
| E1-ZN-D1          | 29.398                                                        | 109.410                |
| E1-ZN-D2          | 34.849                                                        | 115.434                |
| D1-ZN-D2          | 42.090                                                        | 102.624                |
| C -O -ZN          | 27.898                                                        | 138.471                |
| C -D1-ZN          | 39.878                                                        | 134.618                |
| C -D2-ZN          | 54.049                                                        | 114.941                |
| CR-E1-ZN          | 63.840                                                        | 118.961                |
| CC-E1-ZN          | 68.556                                                        | 133.570                |
| CW-CC-E1          | 70.000                                                        | 120.000                |
| H5-CR-E1          | 35.000                                                        | 120.000                |
| NA-CR-E1          | 70.000                                                        | 120.000                |
| CC-E1-CR          | 70.000                                                        | 117.000                |
| CT-CC-E1          | 70.000                                                        | 120.000                |
| CT-C -D1          | 70.000                                                        | 117.000                |
| CT-C -D2          | 70.000                                                        | 117.000                |
| CT-C -O2          | 70.000                                                        | 117.000                |
| O2-C -D1          | 126.557                                                       | 121.174                |
| O2-C -D2          | 126.557                                                       | 121.174                |
| D1-ZN-OH          | 28.321                                                        | 81.560                 |
| E1-ZN-OH          | 231.671                                                       | 98.119                 |
| D2-ZN-OH          | 27.440                                                        | 98.008                 |
| HO-OH-ZN          | 52.287                                                        | 78.808                 |
| N -OH-ZN          | 71.024                                                        | 108.152                |



**Table S7.** Bond and angle parameters of Drug 5 with the HDAC2 zinc-binding site.

| <b>Bond Type</b>  | <b>Bond stretch force constant (Kcal/(mol*Å<sup>2</sup>))</b> | <b>Bond length (Å)</b> |
|-------------------|---------------------------------------------------------------|------------------------|
| ZN-E1             | 68.53                                                         | 2.028                  |
| ZN-D1             | 73.98                                                         | 1.945                  |
| ZN-D2             | 93.42                                                         | 1.929                  |
| ZN-O              | 42.69                                                         | 2.018                  |
| C -O2             | 656.00                                                        | 1.250                  |
| C -D1             | 656.00                                                        | 1.250                  |
| C -D2             | 656.00                                                        | 1.250                  |
| CR-E1             | 488.00                                                        | 1.335                  |
| CC-E1             | 410.00                                                        | 1.394                  |
| OH-ZN             | 78.64                                                         | 1.951                  |
| <b>Angle Type</b> | <b>Angle bend force constant [Kcal/(mol*rad<sup>2</sup>)]</b> | <b>Angle [degree]</b>  |
| O -ZN-E1          | 23.313                                                        | 117.307                |
| O -ZN-D1          | 35.887                                                        | 110.838                |
| O -ZN-D2          | 44.443                                                        | 100.046                |
| E1-ZN-D1          | 29.398                                                        | 109.410                |
| E1-ZN-D2          | 34.849                                                        | 115.434                |
| D1-ZN-D2          | 42.090                                                        | 102.624                |
| C -O -ZN          | 27.898                                                        | 138.471                |
| C -D1-ZN          | 39.878                                                        | 134.618                |
| C -D2-ZN          | 54.049                                                        | 114.941                |
| CR-E1-ZN          | 63.840                                                        | 118.961                |
| CC-E1-ZN          | 68.556                                                        | 133.570                |
| CW-CC-E1          | 70.000                                                        | 120.000                |
| H5-CR-E1          | 35.000                                                        | 120.000                |
| NA-CR-E1          | 70.000                                                        | 120.000                |
| CC-E1-CR          | 70.000                                                        | 117.000                |
| CT-CC-E1          | 70.000                                                        | 120.000                |
| CT-C -D1          | 70.000                                                        | 117.000                |
| CT-C -D2          | 70.000                                                        | 117.000                |
| CT-C -O2          | 70.000                                                        | 117.000                |
| O2-C -D1          | 126.557                                                       | 121.174                |
| O2-C -D2          | 126.557                                                       | 121.174                |
| D1-ZN-OH          | 28.321                                                        | 81.560                 |
| E1-ZN-OH          | 231.671                                                       | 98.119                 |
| D2-ZN-OH          | 27.440                                                        | 98.008                 |
| HO-OH-ZN          | 52.287                                                        | 78.808                 |
| N -OH-ZN          | 71.024                                                        | 108.152                |

**Table S8.** The average values of RMSD, RMSF, and Rg analysis of protein-ligand complexes.

| <b>Compounds</b> | <b>RMSD (Å)</b> | <b>RMSF (Å)</b> | <b>Rg (Å)</b> |
|------------------|-----------------|-----------------|---------------|
| Protein          | 1.72            | 0.85            | 1.69          |
| Drug-1           | 1.33            | 0.78            | 1.64          |
| Drug-2           | 1.43            | 0.83            | 1.67          |
| Drug-3           | 1.57            | 0.88            | 1.69          |
| Drug-4           | 1.45            | 0.74            | 1.68          |
| Drug-5           | 1.50            | 0.78            | 1.64          |

**Table S9.** The average values of H-bond analysis of protein-ligand complexes.

| <b>Compounds</b> | <b>The average no. of H-bonds</b> |
|------------------|-----------------------------------|
| Drug-1           | 1                                 |
| Drug-2           | 1                                 |
| Drug-3           | 1                                 |
| Drug-4           | 1                                 |
| Drug-5           | 1                                 |

**Table S10.** Binding energy values for protein-ligand complexes in Interaction Entropy (IE) method

| <b>Compounds</b> | <b>Enthalpy (<math>\Delta H</math>)<br/>kcal mol<sup>-1</sup></b> | <b>Entropy (T<math>\Delta S</math>)<br/>kcal mol<sup>-1</sup></b> | <b>Total Binding Free<br/>Energy (<math>\Delta G_{bind}</math>)<br/>kcal mol<sup>-1</sup></b> |
|------------------|-------------------------------------------------------------------|-------------------------------------------------------------------|-----------------------------------------------------------------------------------------------|
| Drug-1           | -34.40 $\pm$ 2.28                                                 | -8.70 $\pm$ 2.18                                                  | -25.70 $\pm$ 2.23                                                                             |
| Drug-2           | -30.49 $\pm$ 1.12                                                 | -15.80 $\pm$ 1.19                                                 | -14.69 $\pm$ 1.15                                                                             |
| Drug-3           | -15.52 $\pm$ 1.22                                                 | -7.21 $\pm$ 1.87                                                  | -8.31 $\pm$ 1.04                                                                              |
| Drug-4           | -11.12 $\pm$ 1.98                                                 | -7.60 $\pm$ 1.66                                                  | -3.52 $\pm$ 1.82                                                                              |
| Drug-5           | -15.97 $\pm$ 2.69                                                 | -12.60 $\pm$ 2.89                                                 | -3.37 $\pm$ 2.79                                                                              |
| Romidepsin       | -15.54 $\pm$ 3.66                                                 | -8.50 $\pm$ 1.98                                                  | -7.04 $\pm$ 0.82                                                                              |

**Table S11.** Binding energy values for protein-ligand complexes in the C2 method.

| Compounds  | Enthalpy ( $\Delta H$ )<br>kcal mol <sup>-1</sup> | Entropy (T $\Delta S$ )<br>kcal mol <sup>-1</sup> | Total Binding Free<br>Energy ( $\Delta G_{\text{bind}}$ )<br>kcal mol <sup>-1</sup> |
|------------|---------------------------------------------------|---------------------------------------------------|-------------------------------------------------------------------------------------|
| Drug-1     | -20.08 ± 1.28                                     | -10.97 ± 1.26                                     | -9.11 ± 1.14                                                                        |
| Drug-2     | -19.08 ± 2.10                                     | -11.01 ± 3.14                                     | -8.07 ± 2.25                                                                        |
| Drug-3     | -25.09 ± 2.24                                     | -18.27 ± 1.13                                     | -6.82 ± 1.16                                                                        |
| Drug-4     | -18.97 ± 3.12                                     | -12.19 ± 2.14                                     | -6.78 ± 2.14                                                                        |
| Drug-5     | -16.09 ± 1.13                                     | -10.01 ± 2.15                                     | -5.99 ± 1.13                                                                        |
| Romidepsin | -15.24 ± 3.15                                     | -11.01 ± 1.13                                     | -4.23 ± 2.14                                                                        |

**Table S12.** Binding energy values for protein-ligand complexes in normal mode method.

| Compounds  | Enthalpy ( $\Delta H$ )<br>kcal mol <sup>-1</sup> | Entropy (T $\Delta S$ )<br>kcal mol <sup>-1</sup> | Total Binding Free<br>Energy ( $\Delta G_{\text{bind}}$ )<br>kcal mol <sup>-1</sup> |
|------------|---------------------------------------------------|---------------------------------------------------|-------------------------------------------------------------------------------------|
| Drug-1     | -24.14 ± 1.12                                     | -8.15 ± 2.12                                      | -15.98 ± 2.10                                                                       |
| Drug-2     | -18.20 ± 2.44                                     | -16.93 ± 2.65                                     | -1.27 ± 2.14                                                                        |
| Drug-3     | -12.42 ± 3.24                                     | -7.58 ± 2.23                                      | -4.84 ± 3.62                                                                        |
| Drug-4     | -11.12 ± 4.12                                     | -7.60 ± 2.25                                      | -3.52 ± 1.14                                                                        |
| Drug-5     | -10.22 ± 1.24                                     | -4.60 ± 2.54                                      | -5.62 ± 3.12                                                                        |
| Romidepsin | -10.12 ± 3.23                                     | -5.60 ± 2.45                                      | -4.52 ± 3.12                                                                        |

**Table S13.** Per-residue decomposition analysis for protein-ligand complexes.

| Amino acid<br>residues | Drug-1<br>(kcal mol <sup>-1</sup> ) | Drug-2<br>(kcal mol <sup>-1</sup> ) | Drug-3<br>(kcal mol <sup>-1</sup> ) | Drug-4<br>(kcal mol <sup>-1</sup> ) | Drug-5<br>(kcal mol <sup>-1</sup> ) |
|------------------------|-------------------------------------|-------------------------------------|-------------------------------------|-------------------------------------|-------------------------------------|
| Pro 23                 | -1.44                               | -1.46                               | -2.30                               | -0.21                               | -0.23                               |
| <b>Phe144</b>          | <b>-2.48</b>                        | <b>-1.61</b>                        | <b>-2.28</b>                        | <b>-0.42</b>                        | <b>-2.06</b>                        |
| <b>Phe199</b>          | <b>-2.77</b>                        | <b>-1.00</b>                        | <b>-0.57</b>                        | <b>-1.09</b>                        | <b>-1.33</b>                        |
| Leu265                 | -3.05                               | -2.22                               | -1.42                               | -1.46                               | -0.02                               |
| <b>Tyr198</b>          | <b>-1.79</b>                        | <b>-0.47</b>                        | <b>-1.26</b>                        | <b>-3.12</b>                        | <b>-0.28</b>                        |
